# Supplementary material for: The crystal chemistry of the alkaline-earth apatites A10(PO4)6CuxOy(H)z (A = Ca, Sr and Ba)
Source: Royal Society of Chemistry journal article supplement (doi:10.1039/b906639j), 2009-01-01
Supplement: b906639j.pdf [file b906639j.pdf]

## Refinement details

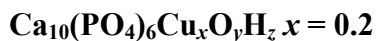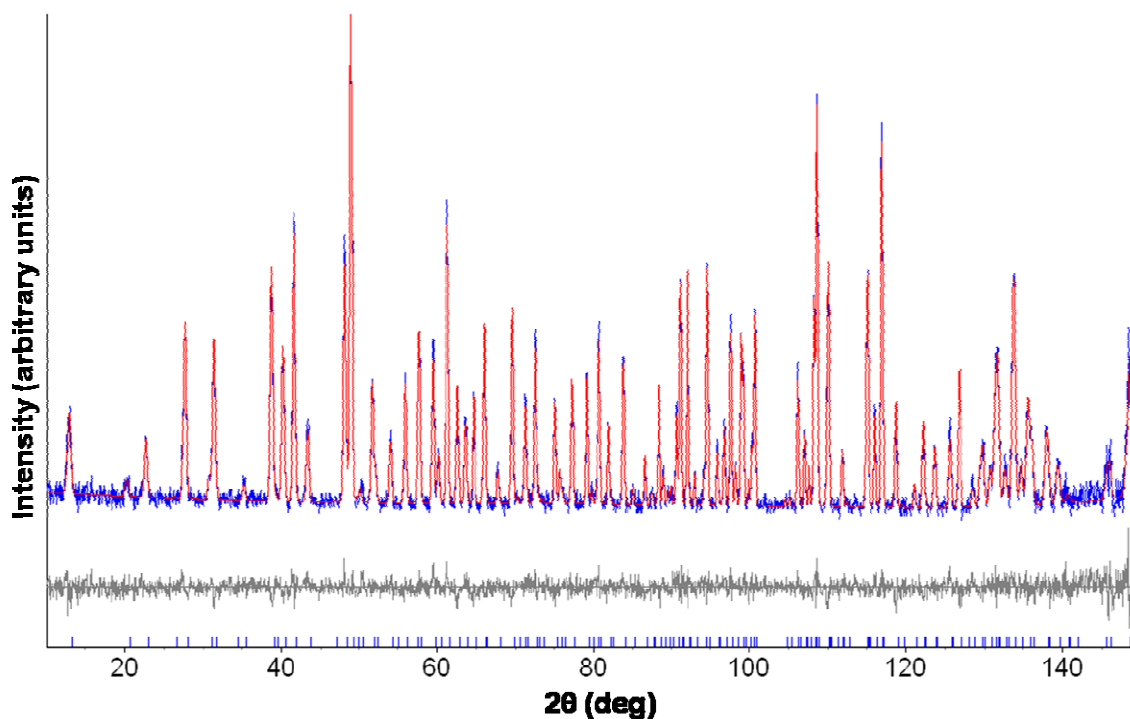

| <i>s.g.</i> | <i>P</i> 6 <sub>3</sub> / <i>m</i> | <i>a</i> = 9.4145(1) Å | <i>c</i> = 6.8811(1) Å | <i>R</i> <sub>wp</sub> = 6.85 % | <i>R</i> <sub>Bragg</sub> = 2.12 % |
|-------------|------------------------------------|------------------------|------------------------|---------------------------------|------------------------------------|
| <b>Site</b> | <b>x</b>                           | <b>y</b>               | <b>z</b>               | <b>B</b>                        | <b>Occ.</b>                        |
| Ca(1)       | 1/3                                | 2/3                    | -0.0024(7)             | 0.68(9)                         | 1                                  |
| Ca(2)       | 0.2521(5)                          | 0.0071(5)              | ¼                      | 0.58(8)                         | 1                                  |
| P           | 0.3684(4)                          | 0.3986(5)              | ¼                      | 0.41(7)                         | 1                                  |
| O(1)        | 0.4846(4)                          | 0.3281(4)              | ¼                      | 0.52(7)                         | 1                                  |
| O(2)        | 0.4668(5)                          | 0.5888(4)              | ¼                      | 1.15(8)                         | 1                                  |
| O(3)        | 0.2584(3)                          | 0.3441(3)              | 0.0708(3)              | 1.25(5)                         | 1                                  |
| O(4)        | 0.0000                             | 0.0000                 | 0.2016(4)              | 0.6(2)                          | 0.46(1)                            |
| Cu          | 0.0000                             | 0.0000                 | 0.0000                 | 0.6(2)                          | 0.10(1)                            |
| H           | 0.0000                             | 0.0000                 | -0.0539(3)             | 1                               | 0.32(1)                            |

| <b>Bond</b> | <b>Distance (Å)</b> |
|-------------|---------------------|
| Ca(1)-O(1)  | 2.400(5)            |
| Ca(1)-O(2)  | 2.461(5)            |
| Ca(1)-O(3)  | 2.799(3)            |
| Ca(2)-O(1)  | 2.702(12)           |
| Ca(2)-O(2)  | 2.354(7)            |

|                   |                    |
|-------------------|--------------------|
| <b>Ca(2)-O(3)</b> | 2.351(3), 2.511(5) |
| <b>Ca(2)-O(4)</b> | 2.364(5)           |
| <b>Ca(2)-Cu</b>   | 2.905(4)           |
| <b>Ca(2)-H</b>    | 2.702(12)          |
| <b>P-O(1)</b>     | 1.538(7)           |
| <b>P-O(2)</b>     | 1.551(5)           |
| <b>P-O(3)</b>     | 1.525(3)           |
| <b>Cu-O(4)</b>    | 1.387(9), 2.054(9) |
| <b>Cu-H</b>       | 0.37(2)            |
| <b>O(4)-H</b>     | 1.02(2)            |
| <b>O(4)-O(4)</b>  | 0.67(2)            |

| <b>Angle</b>       | <b>°</b> |
|--------------------|----------|
| <b>O(1)-P-O(3)</b> | 111.4(3) |
| <b>O(1)-P-O(2)</b> | 110.8(2) |
| <b>O(3)-P-O(3)</b> | 108.0(3) |
| <b>O(3)-P-O(2)</b> | 107.6(3) |

$\text{Ca}_{10}(\text{PO}_4)_6\text{Cu}_x\text{O}_y\text{H}_z$   $x = 0.6$

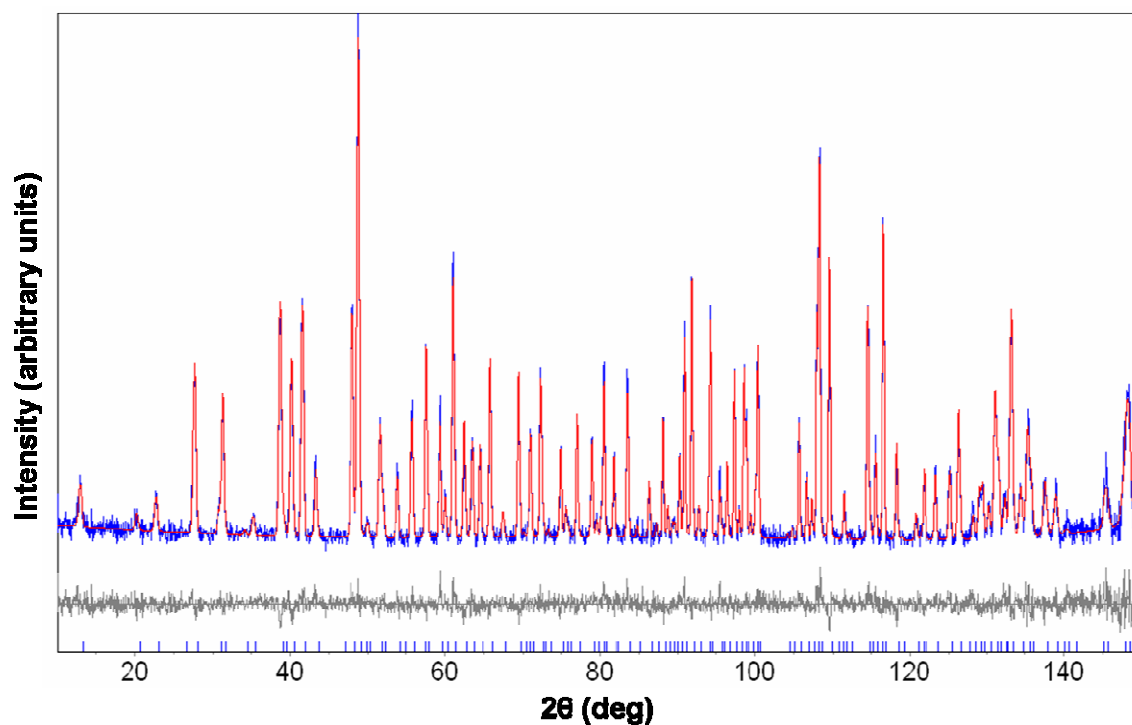

| <i>s.g.</i> | <i>P6<sub>3</sub>/m</i> | <i>a</i> = 9.4262(1) Å | <i>c</i> = 6.9003(1) Å | <i>R<sub>wp</sub></i> = 6.90 % | <i>R<sub>Bragg</sub></i> = 2.32 % |
|-------------|-------------------------|------------------------|------------------------|--------------------------------|-----------------------------------|
| Site        | <i>x</i>                | <i>y</i>               | <i>z</i>               | <i>B</i>                       | <i>Occ.</i>                       |
| Ca(1)       | 1/3                     | 2/3                    | -0.0029(7)             | 1.02(9)                        | 1                                 |
| Ca(2)       | 0.2549(5)               | 0.0080(5)              | 1/4                    | 0.64(8)                        | 1                                 |
| P           | 0.3696(4)               | 0.3999(5)              | 1/4                    | 0.56(7)                        | 1                                 |
| O(1)        | 0.4846(4)               | 0.3292(4)              | 1/4                    | 0.43(7)                        | 1                                 |
| O(2)        | 0.4667(5)               | 0.5890(4)              | 1/4                    | 1.16(8)                        | 1                                 |
| O(3)        | 0.2589(3)               | 0.3455(3)              | 0.0712(3)              | 1.26(5)                        | 1                                 |
| O(4)        | 0.0000                  | 0.0000                 | 0.2058(12)             | 0.7(2)                         | 0.50(1)                           |
| Cu          | 0.0000                  | 0.0000                 | 0.0000                 | 0.7(2)                         | 0.30(1)                           |
| H           | 0.0000                  | 0.0000                 | -0.043(6)              | 1                              | 0.20(1)                           |

| Bond       | Distance (Å)       |
|------------|--------------------|
| Ca(1)-O(1) | 2.406(5)           |
| Ca(1)-O(2) | 2.467(5)           |
| Ca(1)-O(3) | 2.792(3)           |
| Ca(2)-O(1) | 2.702(5)           |
| Ca(2)-O(2) | 2.341(7)           |
| Ca(2)-O(3) | 2.358(5), 2.525(4) |
| Ca(2)-O(4) | 2.385(5)           |
| Ca(2)-Cu   | 2.928(4)           |
| Ca(2)-H    | 2.76(2)            |
| P-O(1)     | 1.531(7)           |
| P-O(2)     | 1.543(5)           |
| P-O(3)     | 1.529(3)           |
| Cu-O(4)    | 1.420(8), 2.030(8) |
| Cu-H       | 0.30(3)            |
| O(4)-H     | 1.12(4)            |
| O(4)-O(4)  | 0.61(2)            |

| Angle       | °        |
|-------------|----------|
| O(1)-P-O(3) | 111.5(3) |
| O(1)-P-O(2) | 111.2(2) |
| O(3)-P-O(3) | 107.5(3) |
| O(3)-P-O(2) | 107.4(2) |

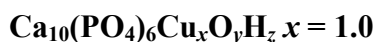

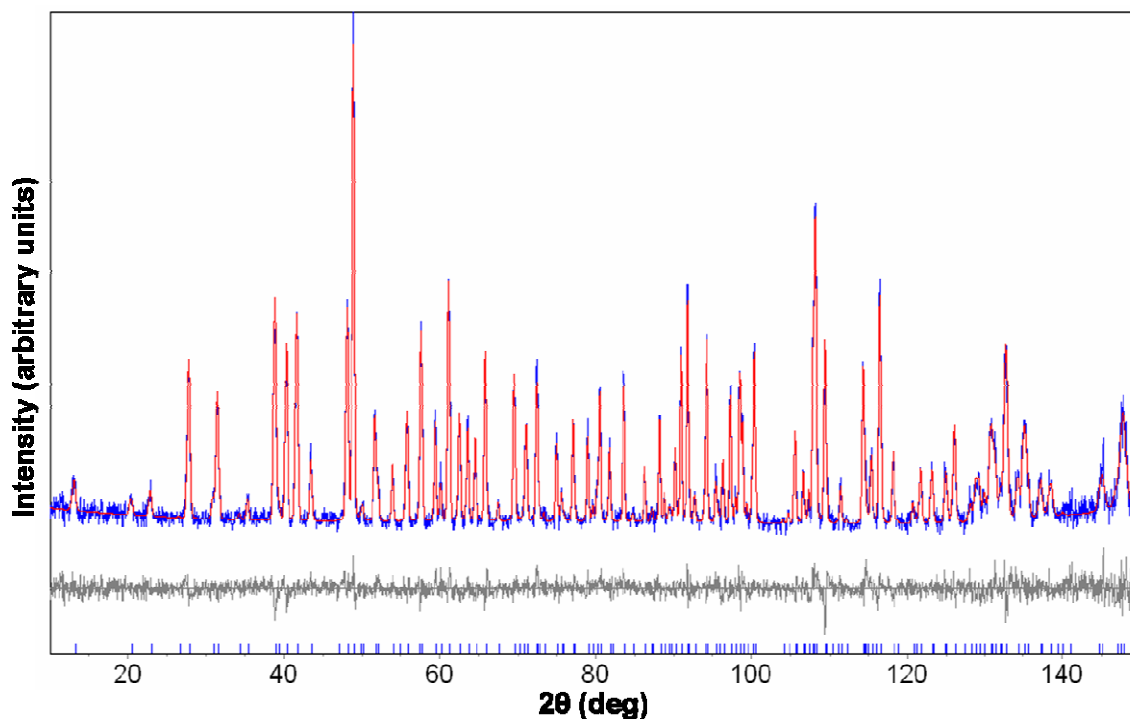

| <i>s.g.</i> | <i>P6<sub>3</sub>/m</i> | <i>a</i> = 9.4392(2) Å | <i>c</i> = 6.9166(1) Å | <i>R<sub>wp</sub></i> = 7.37 % | <i>R<sub>Bragg</sub></i> = 2.30 % |
|-------------|-------------------------|------------------------|------------------------|--------------------------------|-----------------------------------|
| <b>Site</b> | <b>x</b>                | <b>y</b>               | <b>z</b>               | <b>B</b>                       | <b>Occ.</b>                       |
| Ca(1)       | 1/3                     | 2/3                    | -0.0015(8)             | 0.9(1)                         | 1                                 |
| Ca(2)       | 0.2554(6)               | 0.0080(6)              | 1/4                    | 0.6(1)                         | 1                                 |
| P           | 0.3697(5)               | 0.3994(5)              | 1/4                    | 0.5(1)                         | 1                                 |
| O(1)        | 0.4850(5)               | 0.3293(4)              | 1/4                    | 0.4(1)                         | 1                                 |
| O(2)        | 0.4661(5)               | 0.5891(5)              | 1/4                    | 1.4(1)                         | 1                                 |
| O(3)        | 0.2589(4)               | 0.3463(4)              | 0.0704(3)              | 1.2(1)                         | 1                                 |
| O(4)        | 0.0000                  | 0.0000                 | 0.2111(16)             | 1.3 (2)                        | 0.50(1)                           |
| Cu          | 0.0000                  | 0.0000                 | 0.0000                 | 1.3(2)                         | 0.36(1)                           |
| H           | 0.0000                  | 0.0000                 | 0.0472(7)              | 1                              | 0.14(1)                           |

| <b>Bond</b> | <b>Distance (Å)</b> |
|-------------|---------------------|
| Ca(1)-O(1)  | 2.415(3)            |
| Ca(1)-O(2)  | 2.460(6)            |
| Ca(1)-O(3)  | 2.786(4)            |
| Ca(2)-O(1)  | 2.706(5)            |
| Ca(2)-O(2)  | 2.345(8)            |
| Ca(2)-O(3)  | 2.359(3), 2.532(5)  |
| Ca(2)-O(4)  | 2.389(6)            |
| Ca(2)-Cu    | 2.937(5)            |
| Ca(2)-H     | 2.76(3)             |

---

|                  |                    |
|------------------|--------------------|
| <b>P-O(1)</b>    | 1.530(8)           |
| <b>P-O(2)</b>    | 1.551(6)           |
| <b>P-O(3)</b>    | 1.537(4)           |
| <b>Cu-O(4)</b>   | 1.460(9), 1.998(9) |
| <b>Cu-H</b>      | 0.32(7)            |
| <b>O(4)-H</b>    | 1.14(7)            |
| <b>O(4)-O(4)</b> | 0.54(2)            |

---

---

|                    |          |
|--------------------|----------|
| <b>Angle</b>       | <b>°</b> |
| <b>O(1)-P-O(3)</b> | 107.7(3) |
| <b>O(1)-P-O(2)</b> | 106.7(3) |
| <b>O(3)-P-O(3)</b> | 112.0(3) |
| <b>O(3)-P-O(2)</b> | 106.7(3) |

---

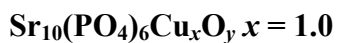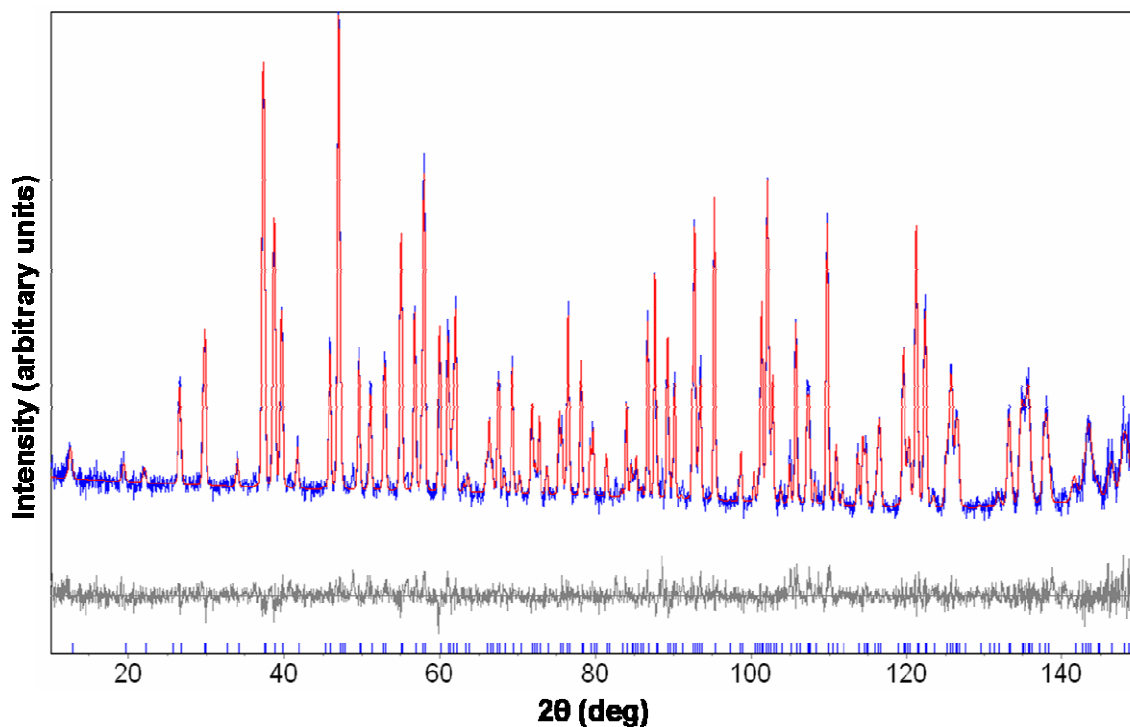

---

|             |                         |                        |                        |                                |                                   |
|-------------|-------------------------|------------------------|------------------------|--------------------------------|-----------------------------------|
| <i>s.g</i>  | <i>P6<sub>3</sub>/m</i> | <i>a</i> = 9.7952(1) Å | <i>c</i> = 7.2931(1) Å | <i>R<sub>wp</sub></i> = 5.95 % | <i>R<sub>Bragg</sub></i> = 2.03 % |
| <b>Site</b> | <b>x</b>                | <b>y</b>               | <b>z</b>               | <b>B</b>                       | <b>Occ.</b>                       |

---

|              |           |            |            |          |         |
|--------------|-----------|------------|------------|----------|---------|
| <b>Sr(1)</b> | 1/3       | 2/3        | -0.0024(6) | 0.51(8)  | 1       |
| <b>Sr(2)</b> | 0.2609(4) | 0.0150(4)  | 1/4        | 0.67(7)  | 1       |
| <b>P</b>     | 0.3675(5) | 0.4008(5)  | 1/4        | 0.32 (9) | 1       |
| <b>O(1)</b>  | 0.4826(5) | 0.3347(4)  | 1/4        | 0.82(8)  | 1       |
| <b>O(2)</b>  | 0.4616(5) | 0.5828(5)  | 1/4        | 1.09 (8) | 1       |
| <b>O(3)</b>  | 0.2624(4) | 0.3482 (4) | 0.0790(4)  | 1.03(7)  | 1       |
| <b>O(4)</b>  | 0.0000    | 0.0000     | 0.2150(4)  | 1.8(2)   | 0.50(1) |
| <b>Cu</b>    | 0.0000    | 0.0000     | 0.0000     | 1.8(6)   | 0.44(1) |
| <b>H</b>     | 0.0000    | 0.0000     | 0.041(2)   | 1.0      | 0.06(1) |

| <b>Bond</b>       | <b>Distance (Å)</b> |
|-------------------|---------------------|
| <b>Sr(1)-O(1)</b> | 2.556(5)            |
| <b>Sr(1)-O(2)</b> | 2.583(5)            |
| <b>Sr(1)-O(3)</b> | 2.898(4)            |
| <b>Sr(2)-O(1)</b> | 2.779(4)            |
| <b>Sr(2)-O(2)</b> | 2.483(6)            |
| <b>Sr(2)-O(3)</b> | 2.525(3), 2.687(4)  |
| <b>Sr(2)-O(4)</b> | 2.499(4)            |
| <b>Sr(2)-Cu</b>   | 3.083(3)            |
| <b>Sr(2)-H</b>    | 2.92(7)             |
| <b>P-O(1)</b>     | 1.556(8)            |
| <b>P-O(2)</b>     | 1.545(6)            |
| <b>P-O(3)</b>     | 1.533(4)            |
| <b>Cu-O(4)</b>    | 1.57(14), 2.08(18)  |
| <b>O(4)-H</b>     | 1.3(16)             |
| <b>O(4)-O(4)</b>  | 0.51(3)             |

| <b>Angle</b>       | <b>°</b> |
|--------------------|----------|
| <b>O(1)-P-O(3)</b> | 111.4(3) |
| <b>O(1)-P-O(2)</b> | 110.0(1) |
| <b>O(3)-P-O(3)</b> | 108.9(3) |
| <b>O(3)-P-O(2)</b> | 107.5(3) |

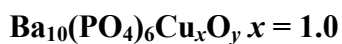

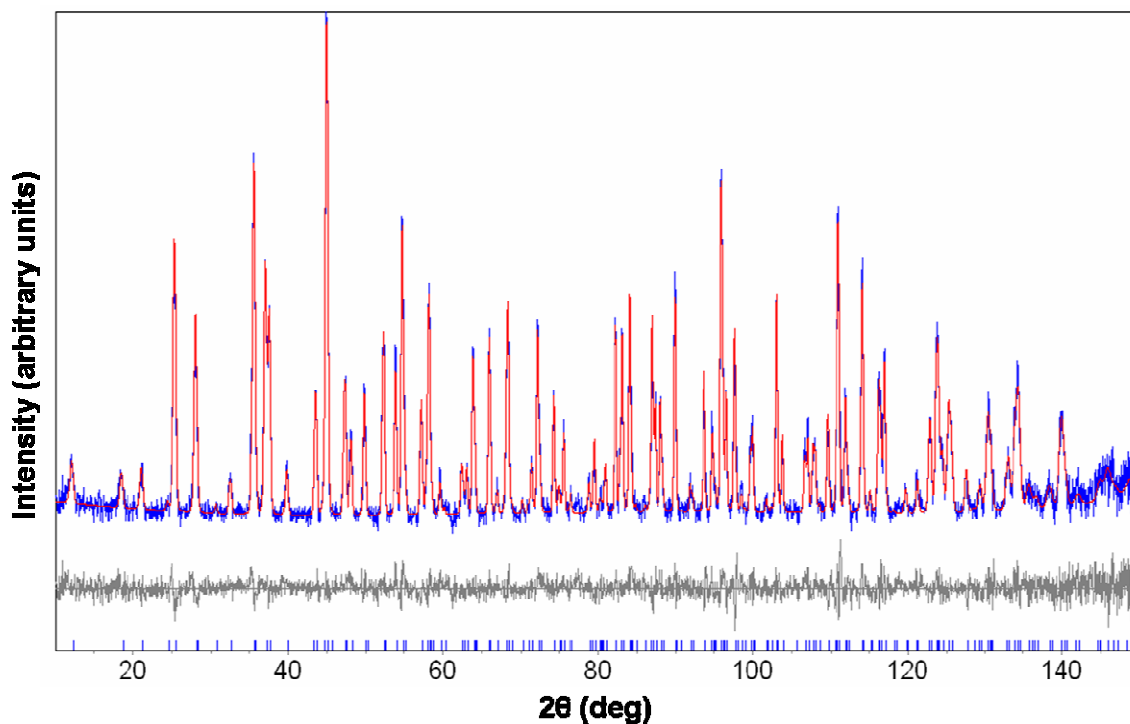

| <i>s.g</i> | $P6_3/m$  | $a = 10.2168(2) \text{ \AA}$ | $c = 7.7347(2) \text{ \AA}$ | $R_{wp} = 8.14 \%$ | $R_{Bragg} = 2.18 \%$ |
|------------|-----------|------------------------------|-----------------------------|--------------------|-----------------------|
| Site       | <i>x</i>  | <i>y</i>                     | <i>z</i>                    | <i>B</i>           | Occ.                  |
| Ba(1)      | 1/3       | 2/3                          | 0.0017(8)                   | 0.7(1)             | 1                     |
| Ba(2)      | 0.2629(6) | 0.0176(6)                    | 1/4                         | 0.9(1)             | 1                     |
| P          | 0.3689(5) | 0.4026(6)                    | 1/4                         | 0.8(1)             | 1                     |
| O(1)       | 0.4796(5) | 0.3412(5)                    | 1/4                         | 1.2(1)             | 1                     |
| O(2)       | 0.4578(5) | 0.5774(5)                    | 1/4                         | 1.0(1)             | 1                     |
| O(3)       | 0.2670(4) | 0.3478(4)                    | 0.0886(4)                   | 1.4(1)             | 1                     |
| O(4)       | 0.0000    | 0.0000                       | 0.196(2)                    | 3.4(4)             | 0.50(1)               |
| Cu         | 0.0000    | 0.0000                       | 0.0000                      | 3.4(4)             | 0.45(1)               |
| H          | 0.0000    | 0.0000                       | 0.0002(4)                   | 1.00               | 0.05(1)               |

|      | $U_{11}$ | $U_{22}$ | $U_{33}$ | $U_{12}$ | $U_{13}$ | $U_{23}$ |
|------|----------|----------|----------|----------|----------|----------|
| O(1) | 0.016    | 0.021    | 0.020    | 0.014    | 0        | 0        |
| O(2) | 0.016    | 0.009    | 0.024    | 0.007    | 0        | 0        |
| O(3) | 0.017    | 0.033    | 0.017    | 0.016    | -0.007   | -0.009   |
| O(4) | 0.006    | 0.006    | 0.230    | 0.003    | 0        | 0        |
| Cu   | 0.004    | 0.004    | 0.109    | 0.002    | 0        | 0        |

| Bond | Distance (Å) |
|------|--------------|
|------|--------------|

|                   |                    |
|-------------------|--------------------|
| <b>Ba(1)-O(1)</b> | 2.757(6)           |
| <b>Ba(1)-O(2)</b> | 2.702(6)           |
| <b>Ba(1)-O(3)</b> | 3.052(4)           |
| <b>Ba(2)-O(1)</b> | 2.918(6)           |
| <b>Ba(2)-O(2)</b> | 2.632(8)           |
| <b>Ba(2)-O(3)</b> | 2.733(3), 2.840(6) |
| <b>Ba(2)-O(4)</b> | 2.632(6)           |
| <b>P-O(1)</b>     | 1.544(9)           |
| <b>P-O(2)</b>     | 1.543(7)           |
| <b>P-O(3)</b>     | 1.540(4)           |
| <b>Cu-O(4)</b>    | 1.52(14), 2.35(19) |
| <b>O(4)-O(4)</b>  | 0.84(4)            |

| <b>Angle</b>       |          | <b>°</b> |
|--------------------|----------|----------|
| <b>O(1)-P-O(3)</b> | 110.1(4) |          |
| <b>O(1)-P-O(2)</b> | 108.6(4) |          |
| <b>O(3)-P-O(3)</b> | 108.3(4) |          |
| <b>O(3)-P-O(2)</b> | 108.6(4) |          |

### Oxygen O1s XPS spectra

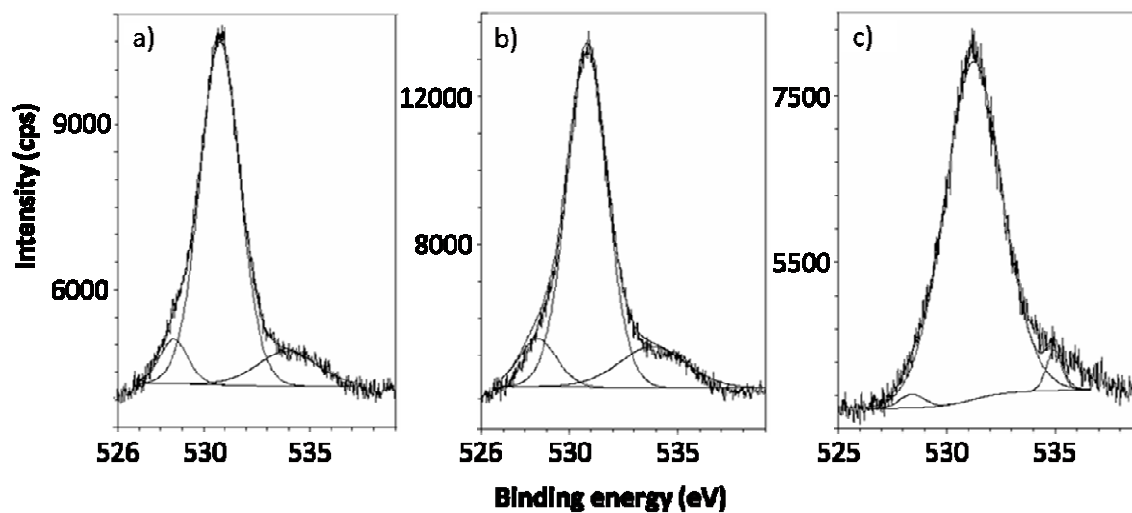

**Figure S1.** High resolution O1s spectra of Cu-apatite ( $x = 1.0$  nominal) for a) Ca, b) Sr and c) Ba materials
